# Supplementary material for: Active refractive index control using a stably evaporable perfluororesin for high-outcoupling-efficiency organic light-emitting diodes
Source: Royal Society of Chemistry journal article supplement (doi:10.1039/d1tc02478g), 2021-01-01
Supplement: d1tc02478g1.pdf [file d1tc02478g1.pdf]

## Supplementary Information

### Active refractive index control using a stably evaporable perfluororesin for high-outcoupling-efficiency organic light-emitting diodes

*Daisuke Yokoyama,\* Tatsuki Sasaki, Yasutaka Suzuki, Takefumi Abe, Kaori Tsuruoka, Tatsuya Miyajima, Toshifumi Kakiuchi, Chiho Morita, Masaharu Aoki, Yasuhiro Ouchi, Wataru Aita, Yasuhiro Kuwana, Yutaka Noguchi*

- Fig. S1:** Calibration curve of SEC  
**S2:** AFM images  
**S3:** XRD patterns  
**S4:** *J-E* characteristics of PBVE-L  
**S5:** Imaginary parts of impedance of hole-only devices  
**S6:** Refractive indices and *J-E* characteristics for  $\alpha$ -NPD:PBVE films  
**S7:** SAXS profiles and electrical properties for 2-TNATA:C<sub>24</sub>F<sub>50</sub> film  
**S8:** Visible/NIR absorption spectra  
**S9:** *J-E* characteristics shown in double logarithmic scale  
**S10:** *J-E* characteristics of electron-only devices with Alq<sub>3</sub> and TPBi  
**S11:** Optical constants of layers in OLEDs  
**S12:** Dependence of outcoupling efficiency on HTL and ETL thicknesses  
**S13:** Angular distribution of electroluminescence  
**S14:** Characteristics of OLED with  $\alpha$ -NPD:PBVE layer

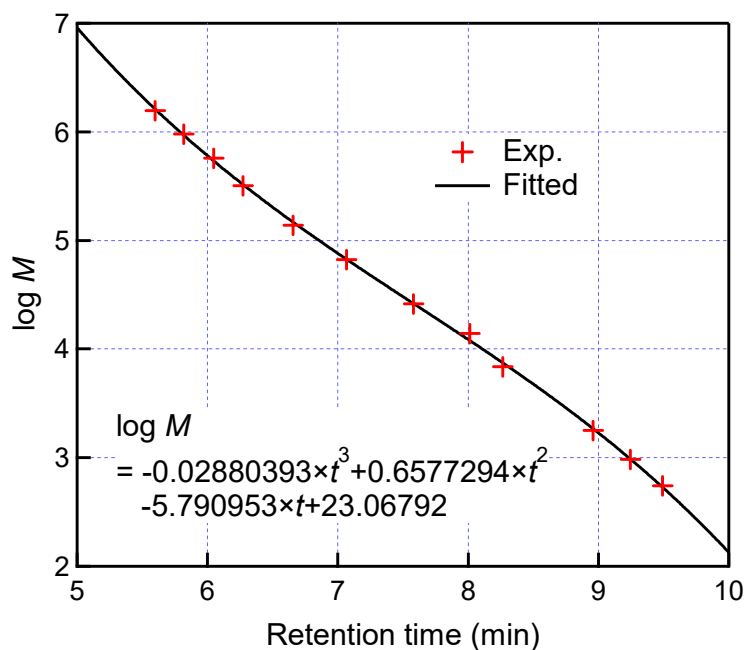

**Fig. S1** Calibration curve of SEC determined using solutions of standard samples of polymethyl methacrylate with known molecular weights of the peak maxima.

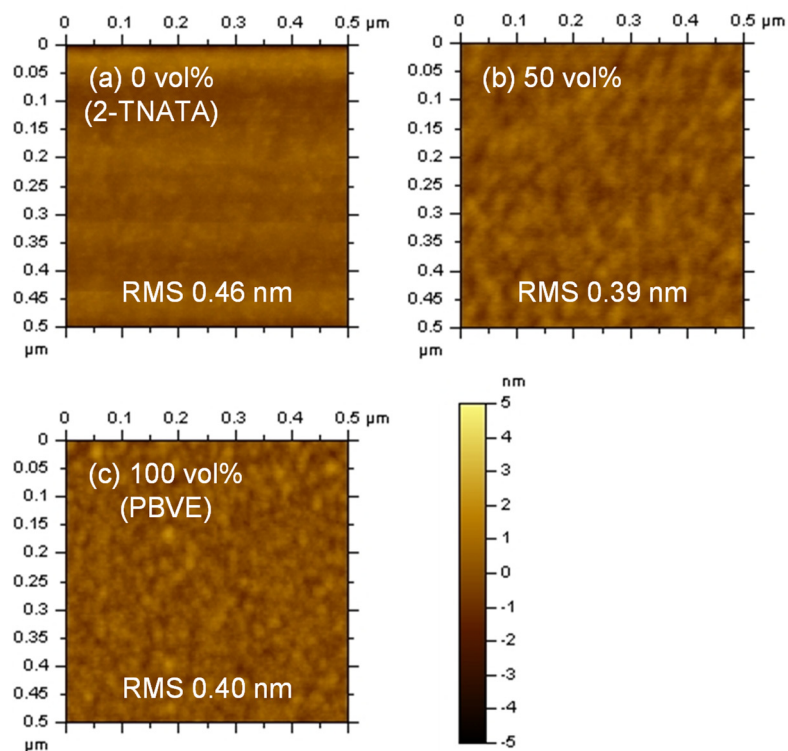

**Fig. S2** AFM images of the surfaces of 10-nm-thick neat and co-deposited 2-TNATA:PBVE films with 0, 50, and 100 vol% PBVE on a Si(100) substrate.

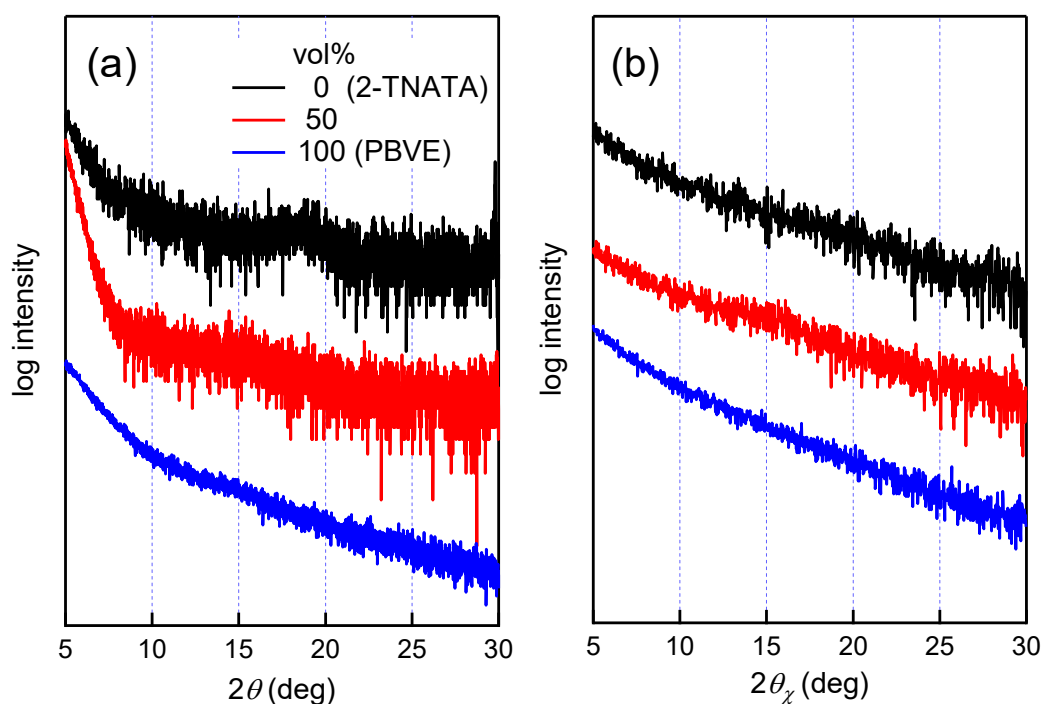

**Fig. S3** (a) Out-of-plane and (b) in-plane XRD patterns of 100-nm-thick neat and co-deposited 2-TNATA:PBVE films with 0, 50, and 100 vol% PBVE on a Si(100) substrate.

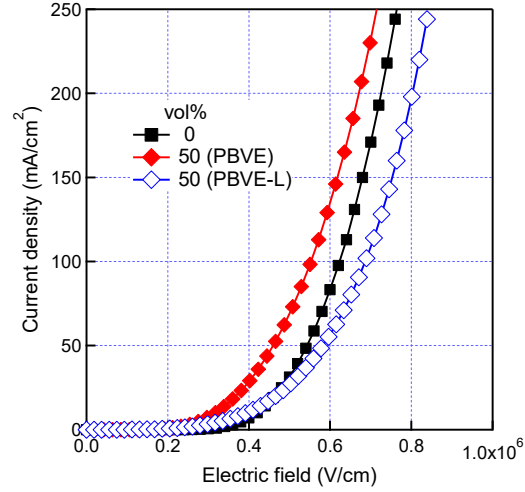

**Fig. S4**  $J$ - $E$  characteristics of hole-only devices of ITO/2-TNATA:PBVE-L (100 nm)/Al (100 nm) with 50 vol% PBVE-L. For comparison,  $J$ - $E$  characteristics of hole-only devices of ITO/2-TNATA:PBVE (100 nm)/Al (100 nm) with 0 and 50 vol% PBVE are also shown.

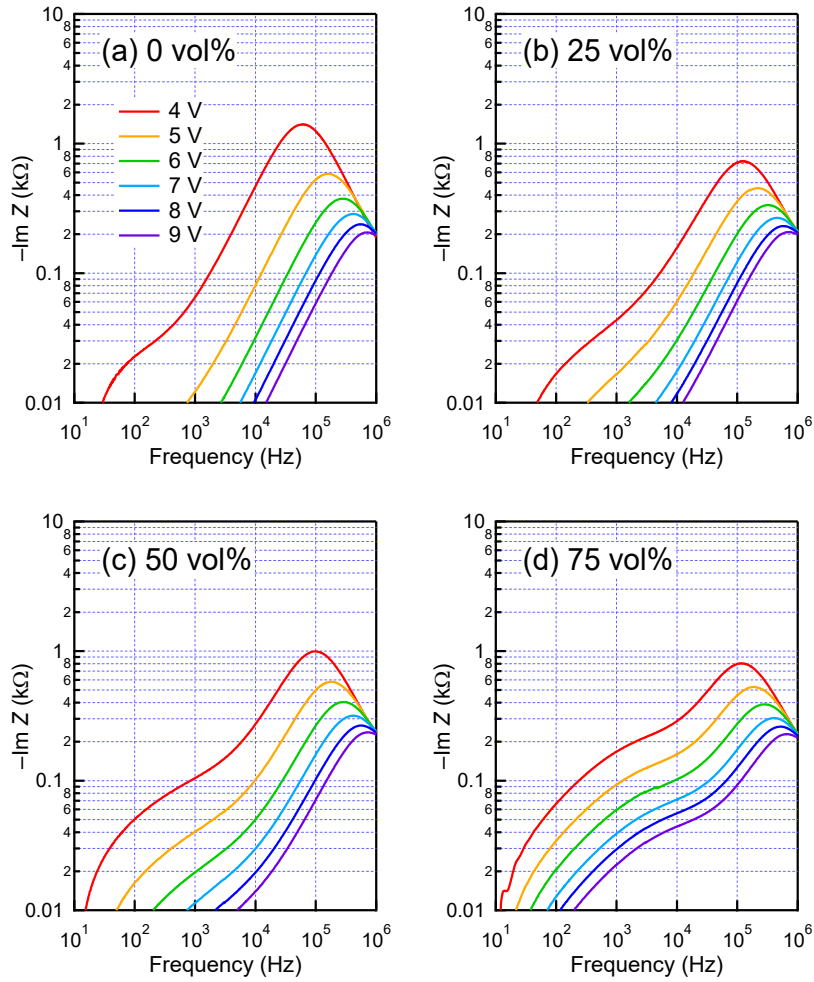

**Fig. S5** Imaginary part of the impedance of hole-only devices of ITO/2-TNATA:PBVE (100 nm)/Al (100 nm) with (a) 0, (b) 25, (c) 50, and (d) 75 vol% PBVE under various DC bias voltages.

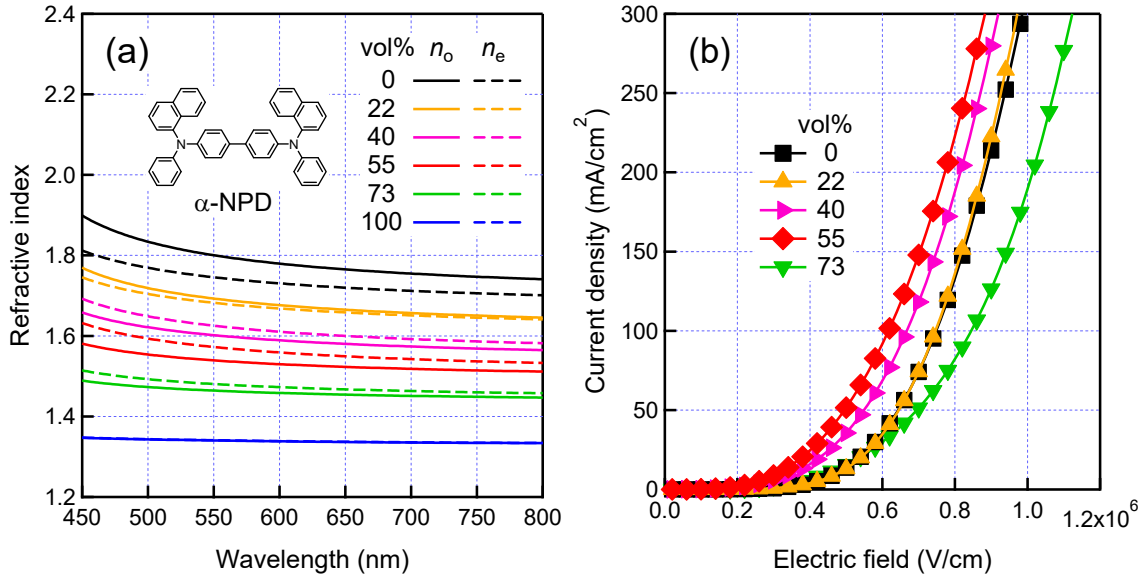

**Fig. S6** (a) Ordinary and extraordinary refractive indices of neat and co-deposited  $\alpha$ -NPD:PBVE films with 0, 22, 40, 55, 73, and 100 vol% PBVE. (b)  $J$ - $E$  characteristics of hole-only devices of ITO/MoO<sub>3</sub> (5 nm)/ $\alpha$ -NPD:PBVE (100 nm)/MoO<sub>3</sub> (10 nm)/Al (100 nm) with 0, 22, 40, 55, and 73 vol% PBVE.

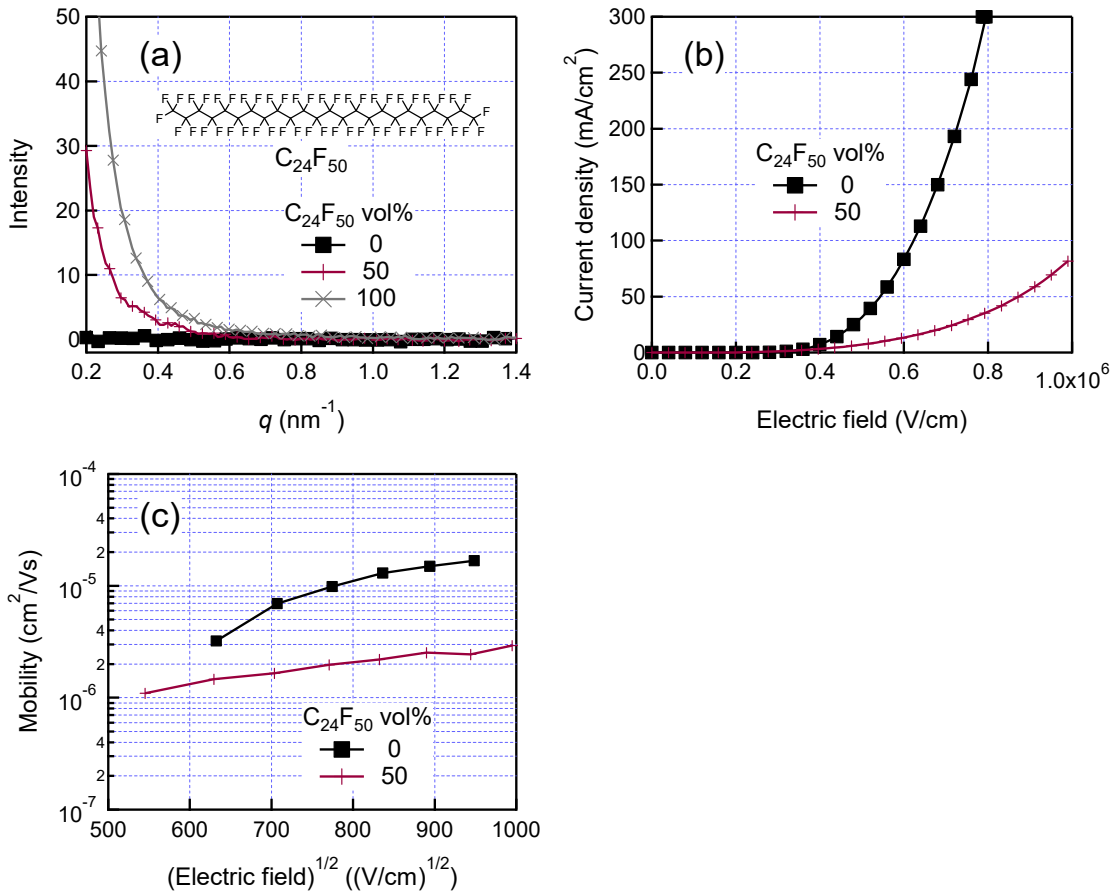

**Fig. S7** (a) SAXS profiles of 100-nm-thick neat and co-deposited 2-TNATA:C<sub>24</sub>F<sub>50</sub> films with 0, 50, and 100 vol% C<sub>24</sub>F<sub>50</sub> on a COP substrate. (b)  $J$ - $E$  characteristics and (c) hole mobilities measured using hole-only devices of ITO/2-TNATA:C<sub>24</sub>F<sub>50</sub> (100 nm)/Al (100 nm) with 0 and 50 vol% C<sub>24</sub>F<sub>50</sub>.

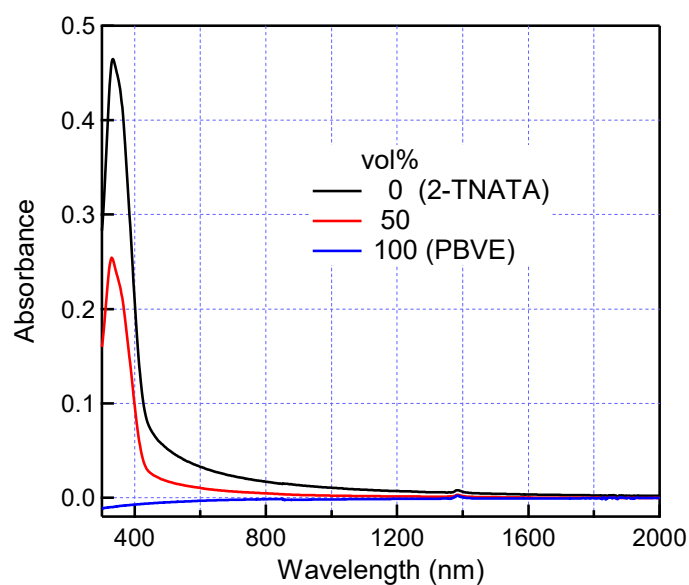

**Fig. S8** (a) Visible/NIR absorption spectra of 50-nm-thick neat and co-deposited 2-TNATA:PBVE films with 0, 50, and 100 vol% PBVE on a fused silica substrate.

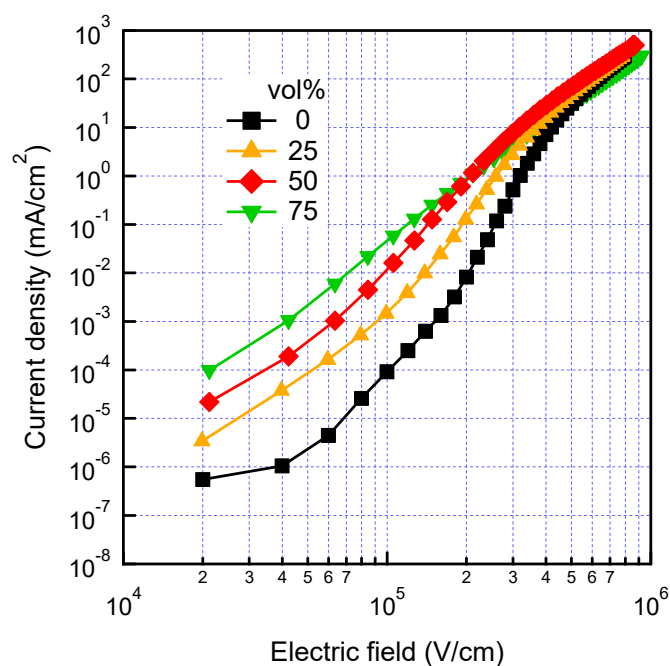

**Fig. S9**  $J$ - $E$  characteristics shown in double logarithmic plot of hole-only devices of ITO/2-TNATA:PBVE (100 nm)/Al (100 nm) with 0, 25, 50, and 75 vol% PBVE (the same data as those in Figure 3(a) shown in linear plot).

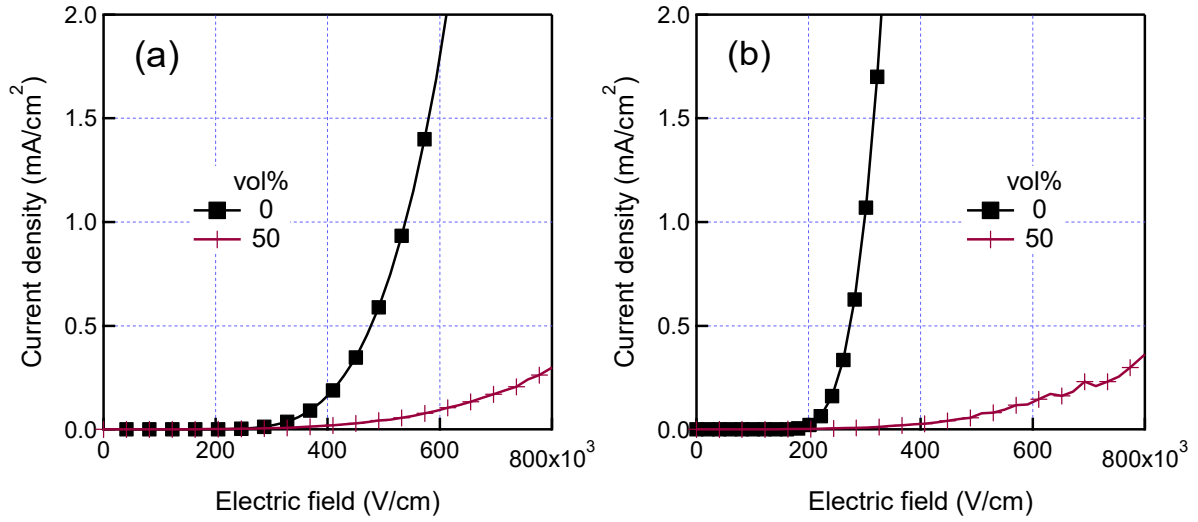

**Fig. S10**  $J$ - $E$  characteristics of electron-only devices of (a) ITO/CsCO<sub>3</sub> (1 nm)/Alq<sub>3</sub>:PBVE (100 nm)/LiF (1 nm)/Al (100 nm) and (b) ITO/CsCO<sub>3</sub> (1 nm)/TPBi:PBVE (100 nm)/LiF (1 nm)/Al (100 nm) with 0 and 50 vol% PBVE, where Alq<sub>3</sub> is tris-(8-hydroxyquinolate)aluminum.

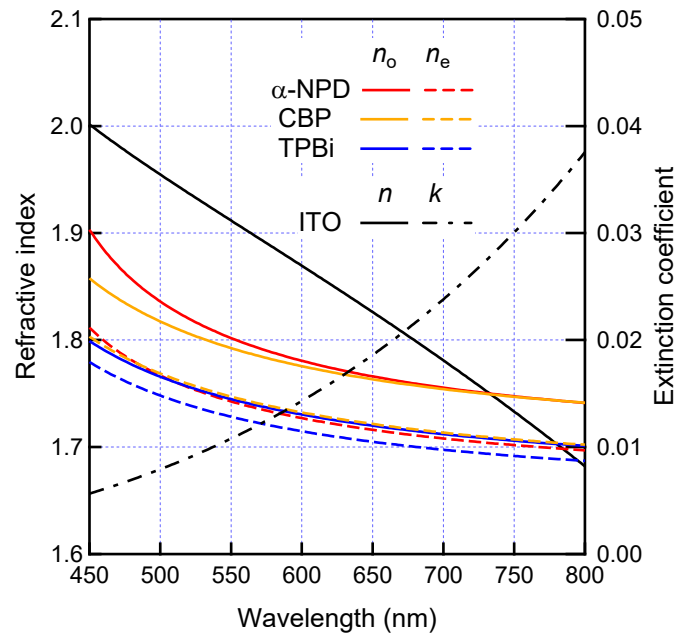

**Fig. S11** Ordinary and extraordinary refractive indices of  $\alpha$ -NPD, CBP, and TPBi layers and isotropic refractive index and extinction coefficient of the ITO layer used for devices.

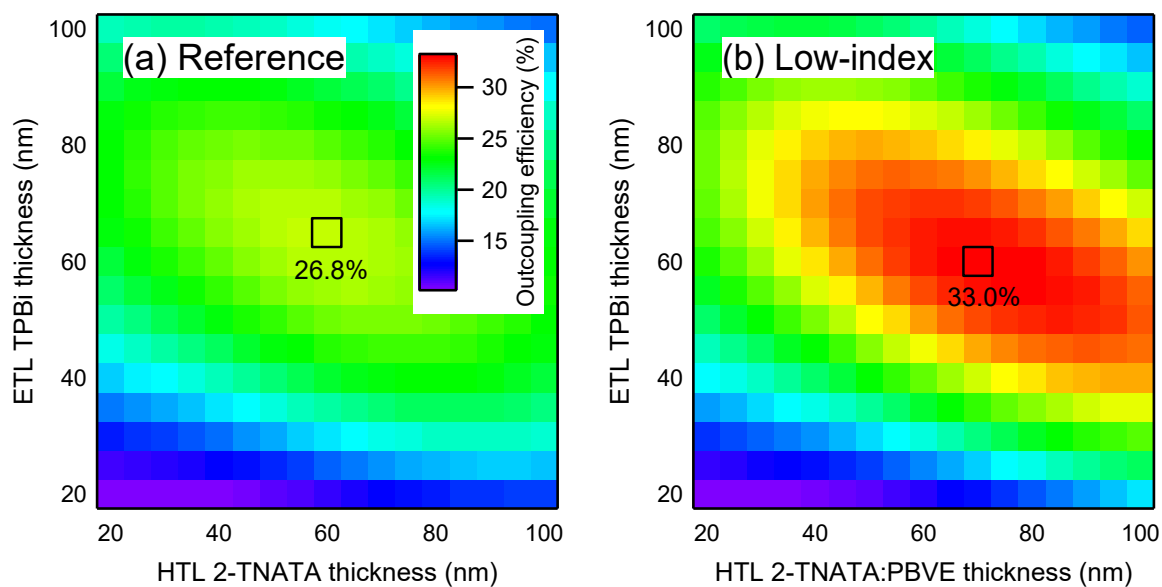

**Fig. S12** Dependence of the outcoupling efficiencies of the reference and low-index devices on HTL and ETL thicknesses. Small squares indicate pairs of thicknesses at which the outcoupling efficiencies are maximized.

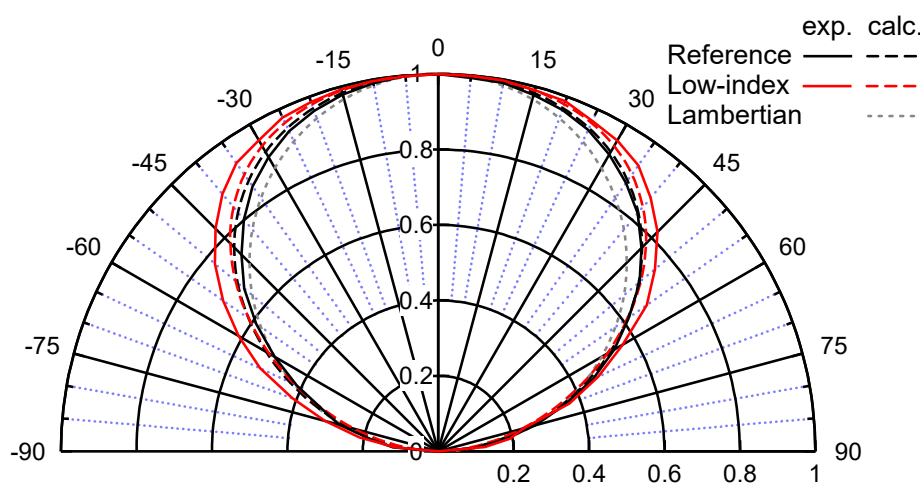

**Fig. S13** Angular distributions of the electroluminescence of the reference and low-index devices. Along with the experimental distributions, the simulated and Lambertian distributions are also shown.

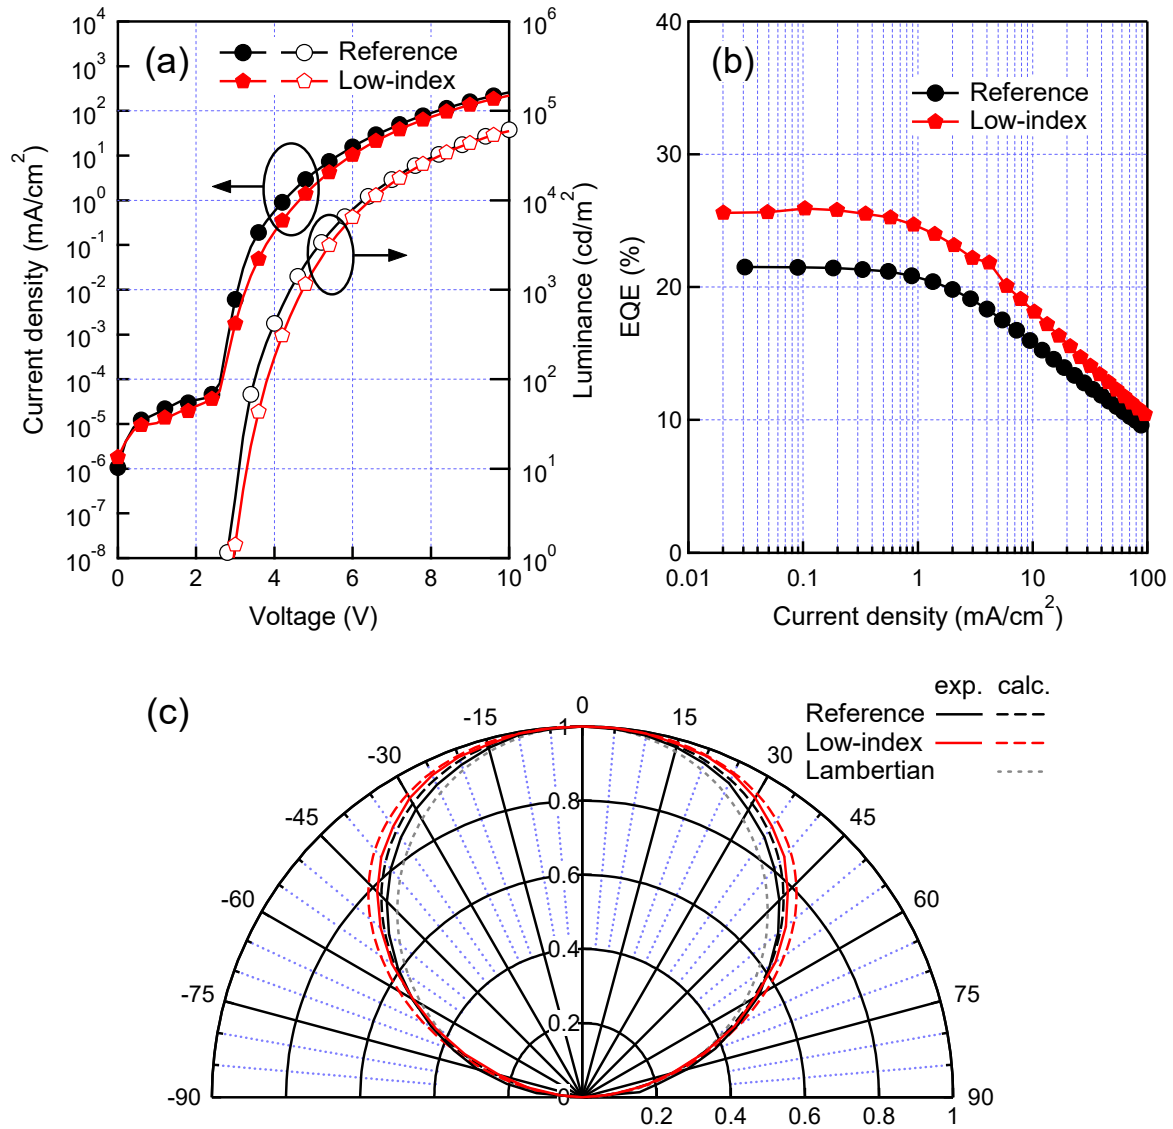

**Fig. S14** (a)  $J$ - $V$ - $L$  characteristics, (b) EQEs, and (c) angular distributions of the electroluminescence of reference and low-index devices that used an  $\alpha$ -NPD and  $\alpha$ -NPD:PBVE layer as the HTL, respectively. The structures of the reference and low-index devices were glass/ITO (100 nm)/MoO<sub>3</sub> (5 nm)/ $\alpha$ -NPD (45 nm)/CBP:Ir(ppy)<sub>2</sub>(acac) (8 wt%, 15 nm)/TPBi (65 nm)/LiF (1 nm)/Al (100 nm) and glass/ITO (100 nm)/MoO<sub>3</sub> (5 nm)/ $\alpha$ -NPD:PBVE (55 vol%, 60 nm)/ $\alpha$ -NPD (10 nm)/CBP:Ir(ppy)<sub>2</sub>(acac) (8 wt%, 15 nm)/TPBi (60 nm)/LiF (1 nm)/Al (100 nm), respectively, where the HTL and ETL thicknesses were optimized using optical simulations so that the outcoupling efficiencies were maximized.
